# Supplementary material
Source: HighWire-hosted journal article supplement (https://www.annfammed.org/highwire/filestream/8204/field_highwire_adjunct_files/3/Morris_Suppl_Table1.pdf)
Supplement: Morris_Suppl_Table1.pdf [file Morris_Suppl_Table1.pdf]

## Online Supplementary Material

Morris DW, Budhwar N, Husain M, et al. Depression treatment in patients with general medical conditions: results from the CO-MED trial. *Ann Fam Med*. 2012;10(1)23-33.

<http://www.annfammed.org/content/10/1/23/suppl/DC1>

**Supplemental Table 1. Additional Patient Characteristics at Baseline by Number of General Medical Conditions**

| Characteristic                                            | No. of General Medical Conditions |                |               |                | Test Statistic     | Between-Group Comparison |                    |                    |                    |                    |                    |                    |
|-----------------------------------------------------------|-----------------------------------|----------------|---------------|----------------|--------------------|--------------------------|--------------------|--------------------|--------------------|--------------------|--------------------|--------------------|
|                                                           | 0<br>(n = 328)                    | 1<br>(n = 158) | 2<br>(n = 98) | ≥3<br>(n = 79) |                    | P Value                  |                    |                    |                    |                    |                    |                    |
|                                                           | No. (%)                           |                |               |                |                    | All                      | 0 vs 1             | 0 vs 2             | 0 vs ≥3            | 1 vs 2             | 1 vs ≥3            | 2 vs ≥3            |
| Menopausal (denominator is number of women)               | 38 (16.8)                         | 47 (43.5)      | 25 (43.1)     | 30 (69.8)      | 61.8 <sup>a</sup>  | <.001                    | <.001 <sup>b</sup> | <.001 <sup>b</sup> | <.001 <sup>b</sup> | .96                | .004 <sup>b</sup>  | .008 <sup>b</sup>  |
| CHRT-SR Suicidal Ideation present (score ≥3) <sup>c</sup> | 60 (18.3)                         | 19 (12.0)      | 20 (20.4)     | 10 (12.7)      | 5.0 <sup>a</sup>   | .17                      | –                  | –                  | –                  | –                  | –                  | –                  |
| PDSQ disorders                                            |                                   |                |               |                | 9.0 <sup>d</sup>   | .67                      | –                  | –                  | –                  | –                  | –                  | –                  |
| 0                                                         | 147 (45.0)                        | 67 (42.4)      | 50 (51.0)     | 31 (39.2)      |                    |                          |                    |                    |                    |                    |                    |                    |
| 1                                                         | 80 (24.5)                         | 41 (25.9)      | 20 (20.4)     | 18 (22.8)      |                    |                          |                    |                    |                    |                    |                    |                    |
| 2                                                         | 50 (15.3)                         | 21 (13.3)      | 9 (9.2)       | 12 (15.2)      |                    |                          |                    |                    |                    |                    |                    |                    |
| 3                                                         | 18 (5.5)                          | 15 (9.5)       | 9 (9.2)       | 8 (10.1)       |                    |                          |                    |                    |                    |                    |                    |                    |
| 4                                                         | 32 (9.8)                          | 14 (8.9)       | 10 (10.2)     | 10 (12.7)      |                    |                          |                    |                    |                    |                    |                    |                    |
|                                                           | Mean (SD)                         |                |               |                |                    |                          |                    |                    |                    |                    |                    |                    |
| Monthly income, \$                                        | 2,391 (3,465)                     | 3,823 (9,207)  | 2,182 (2,417) | 2,247 (3,512)  | 8.1 <sup>a</sup>   | .04                      | .007 <sup>b</sup>  | .64                | .69                | .058               | .07                | .91                |
| BMI, kg/m <sup>2</sup>                                    | 28.8 (7.8)                        | 32.1 (8.9)     | 36.6 (10.0)   | 34.9 (8.8)     | 52.3 <sup>a</sup>  | <.001                    | <.001 <sup>b</sup> | <.001 <sup>b</sup> | <.001 <sup>b</sup> | .27                | .008 <sup>b</sup>  | .17                |
| Systolic BP                                               | 120 (17)                          | 128 (16)       | 129 (19)      | 134 (17)       | 18.3 <sup>e</sup>  | <.001                    | <.001 <sup>b</sup> | <.001 <sup>b</sup> | <.001 <sup>b</sup> | .68                | .01                | .08                |
| Diastolic BP                                              | 77.4 (11.7)                       | 80.5 (11.2)    | 81.1 (12.6)   | 81.3 (10.5)    | 5.1 <sup>e</sup>   | .002                     | .006 <sup>b</sup>  | .007 <sup>b</sup>  | .007 <sup>b</sup>  | .69                | .60                | .92                |
| Pulse                                                     | 72.9 (10.8)                       | 73.4 (11.2)    | 75.8 (14.3)   | 73.2 (11.0)    | 1.7 <sup>f</sup>   | .17                      | –                  | –                  | –                  | –                  | –                  | –                  |
| Number of concomitant medications                         | 1.7 (1.5)                         | 2.8 (2.0)      | 4.7 (2.9)     | 6.4 (4.1)      | 239.3 <sup>a</sup> | <.001                    | <.001 <sup>b</sup> |
| HRSD <sub>17</sub> score                                  | 23.7 (4.7)                        | 23.4 (5.1)     | 24.3 (4.8)    | 24.8 (4.5)     | 1.8 <sup>g</sup>   | .15                      | –                  | –                  | –                  | –                  | –                  | –                  |
| QIDS-C <sub>16</sub> score                                | 15.9 (3.5)                        | 15.3 (3.4)     | 16.1 (3.6)    | 15.9 (3.1)     | 1.4 <sup>h</sup>   | .24                      | –                  | –                  | –                  | –                  | –                  | –                  |

BMI = body mass index; BP = blood pressure; CHRT-SR = Concise Health Risk Tracking-Self-Report; HRSD<sub>17</sub> = 17-item Hamilton Rating Scale for Depression; MDD = major depressive disorder; PDSQ = Psychiatric Diagnostic Screening Questionnaire; QIDS-C<sub>16</sub> = 16-item Quick Inventory of Depressive Symptomatology–Clinician rated.

Notes: CHRT-SR Suicidal Ideation scores range from 0 to 44 (Propensity subscale) and 0 to 11 (Risk subscale), with higher scores indicating greater pathology. HRSD<sub>17</sub> scores range from 0 to 52, with higher scores indicating greater levels of depression. QIDS-C<sub>16</sub> scores range from 0 to 27, with higher scores indicating greater levels of depression.

<sup>a</sup>  $\chi^2_3$ . The  $\chi^2$  for continuous measures indicates Kruskal-Wallis test.

<sup>b</sup> The post hoc comparison was significant after Bonferroni correction ( $P < .0083$ ).

<sup>c</sup> Suicidal Ideation present when any item on the Suicide Risk scale = 3 or higher.

<sup>d</sup>  $\chi^2_{12}$ .

<sup>e</sup>  $F_{3,652}$ .

<sup>f</sup>  $F_{3,651}$ .

<sup>g</sup>  $F_{3,657}$ .

<sup>h</sup>  $F_{3,659}$ .
